# Supplementary material
Source: Springer Nature journal article supplement (https://www.springermedizin.de/resource/supplementary/12875_2011_632_MOESM3_ESM.pdf/9434828)

**QUALICOPC consortium:**

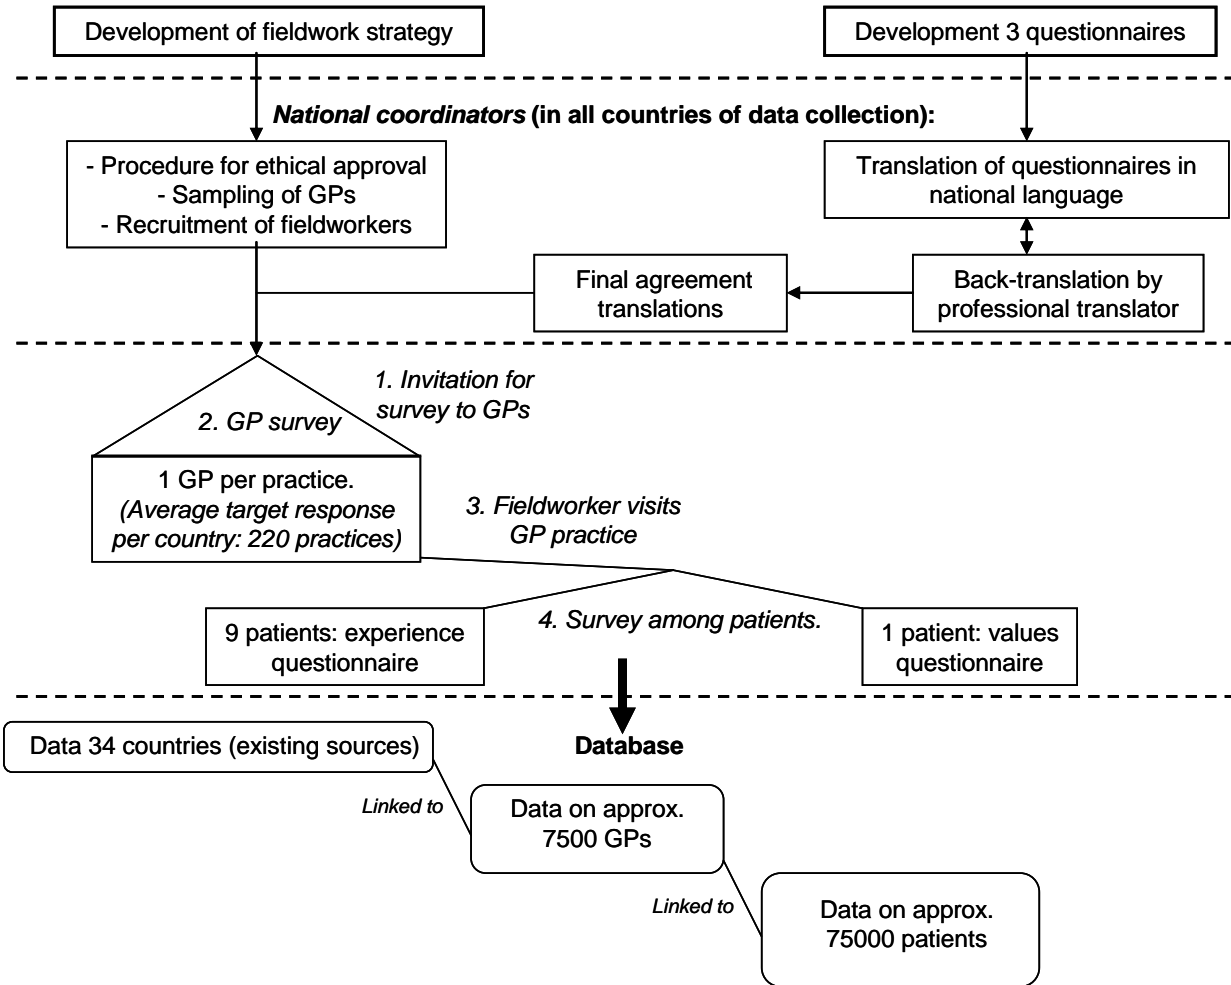

Supplement: MOESM3 [file 9434828]
